# Supplementary material for: Acemetacin cocrystals and salts: structure solution from powder X-ray data and form selection of the piperazine salt
Source: PubMed Central journal article supplement (PMC4062091; doi:10.1107/s2052252514004229), 2014-02-28
Supplement: m-01-00136-sup9.pdf [file m-01-00136-sup9.pdf]

## Supporting Information

### Acemetacin Cocrystals and Salts: Structure Solution from Powder X-ray Data and Form Selection of the Piperazine Salt

Palash Sanphui,<sup>†</sup> Geetha Bolla,<sup>†</sup> Ashwini Nangia,<sup>†,\*</sup> and Vladimir V. Chernyshev,<sup>#,‡,\*</sup>

<sup>†</sup>School of Chemistry, University of Hyderabad, Prof. C. R. Rao Road, Central University P.O., Hyderabad 500046, India. E-mail: [ashwini.nangia@gmail.com](mailto:ashwini.nangia@gmail.com)

<sup>#</sup> Department of Chemistry, M.V. Lomonosov Moscow State University, 1-3 Leninskie Gory, Moscow 119991, Russian Federation,

<sup>‡</sup> A. N. Frumkin, Institute of Physical Chemistry and Electrochemistry RAS, 31 Leninsky prospect, Moscow 119071, Russian Federation. E-mail: [vladimir@struct.chem.msu.ru](mailto:vladimir@struct.chem.msu.ru)

**Table S1** CSD version 5.34, November 2012, May 2013 update.

| Refcodes of carboxylic acid cocrystals with nicotinamide (NAM): Total 44 hits. |        |          |          |        |          |        |
|--------------------------------------------------------------------------------|--------|----------|----------|--------|----------|--------|
| Acid...pyridine heterosynthon: 27 hits (61.4%)                                 |        |          |          |        |          |        |
| ABULEQ                                                                         | ABULIU | CUYXUQ   | DUZPAQ   | EXAQAW | EXAQEA   | EXAQIE |
| EXAQOK                                                                         | FIFLAI | IACNCA   | JEMDIP   | JILZOU | NUKXUN   | NUKYOI |
| NUKZEZ                                                                         | NUKZOJ | PAMXAE   | PEQBES   | SODDIZ | SODDOF   | SOGLAC |
| SUTLUX                                                                         | UCOTUC | YASGOQ   | JILZOU01 | EDAPOQ | PEKRUU   |        |
| Acid...amide heterosynthon: 7 hits (15.9%)                                     |        |          |          |        |          |        |
| MUPMOA                                                                         | MUPNIV | MUPPAP   | RUYHEZ   | XAQQIQ | YASGOQ03 | YASHIL |
| Both acid...pyridine and acid...amide heterosynthons: 10 hits (22.7%)          |        |          |          |        |          |        |
| NUKYAU                                                                         | NUKYEY | NUKYIC   | NUKYUO   | NUKZAV | NUKZID   | PAMXIM |
| XAQPUB                                                                         | HEGGAD | NUKYAU01 |          |        |          |        |

| Refcodes of carboxylic acid cocrystals with isonicotinamide (INA): Total 65 hits. |        |        |        |        |        |        |
|-----------------------------------------------------------------------------------|--------|--------|--------|--------|--------|--------|
| Acid...pyridine heterosynthon: 50 hits (76.9 %)                                   |        |        |        |        |        |        |
| SAXPAK                                                                            | AJAKAY | AJAKEB | ASAXOH | ASAXUN | BUDWEC | CECGUK |
| HANHEL                                                                            | JAWWAG | JAWWEK | LUNMEM | LUNMIQ | LUNMOW | LUNMUC |
| LUNNAJ                                                                            | LUNNEN | LUNNIR | LUNNOX | LUNNUD | LUNPAL | LUNPEP |
| MELYEI                                                                            | MUPNUH | OCEBUV | PAMQAX | PAMWUX | ROLFOO | ROLFUU |
| RONDAA                                                                            | RONDEE | RONDII | ULAWAF | ULAWEJ | ULAWOT | ULAWUZ |
| ULAXAG                                                                            | UMUYUX | UMUZAE | UYOSUX | UYOTAE | UYOTEI | UYOTIM |
| UYOTOS                                                                            | UYOTUY | UYOVAG | UYOVEK | XAQQEM | ACOMOW | ACONEN |
| ACONIR                                                                            |        |        |        |        |        |        |
| Acid...amide heterosynthon: 2 hits (3%)                                           |        |        |        |        |        |        |
| MUPNER                                                                            | VAKTOR |        |        |        |        |        |
| Both acid...pyridine and acid...amide heterosynthons: 13 hits (20%)               |        |        |        |        |        |        |
| AJAKIF                                                                            | BUDZUV | BUFBIP | BUFQAU | HANBOO | ISIJAW | ISIJEA |
| ISIJIE                                                                            | LUNMAI | MOVTOH | ULAXEK | XAQPOV | ACOMUC |        |

| Refcodes of carboxylic acid cocrystals with picolinamide : Total 0 hits. |  |  |  |  |  |  |
|--------------------------------------------------------------------------|--|--|--|--|--|--|
| No picolinamide: carboxylic acid cocrystals are reported in the CSD.     |  |  |  |  |  |  |

**Table S2** Summary of recodes of carboxylic acids cocrystals with both NAM and INA.

| <b>Carboxylic acids</b>                     | <b>INA cocrystals</b> | <b>NAM cocrystals</b>               |
|---------------------------------------------|-----------------------|-------------------------------------|
| Succinic acid                               | LUNNUD                | DUZPAQ                              |
| Fumaric acid                                | LUNNOX                | EDAPOQ                              |
| Ferulic acid <sup>a</sup>                   | MUPNER                | MUPNIV                              |
| Gallic acid <sup>a</sup>                    | MUPNUH                | MUPPAP                              |
| Malonic acid                                | ULAW EJ               | NUKXUN                              |
| Glutaric acid                               | ULAXAG                | NUKYEY                              |
| Adipic acid                                 | ULAXEK                | NUKYIC                              |
| Adipic acid                                 | ULAWUZ                | NUKYOI                              |
| Pimelic acid                                | ISIJE A               | NUKYUO                              |
| Suberic acid                                | ISIJIE                | NUKZEZ                              |
| Azelaic acid                                | ISIJAW                | NUKZID                              |
| Pyridine-2,6-dicarboxylic acid <sup>a</sup> | MELYEI                | PAMXAE                              |
| 4-Hydroxybenzoic acid                       | VAKTOR                | RUYHEZ                              |
| 1-Hydroxybenzoic acid                       | XAQQEM                | SODDOF                              |
| 3-hydroxybenzoic acid                       | LUNMEM                | XAQQIQ                              |
| Naproxen                                    | PAMQAX                | --- <sup>b</sup>                    |
| Fisetin <sup>a</sup>                        | CCDC no.<br>938498    | EtOH hemisolvate<br>CCDC no. 938496 |

<sup>a</sup> Note indicates cocrystal hydrates.

<sup>b</sup> No refcode is available.

**Table S3**  $^{13}\text{C}$  SS-NMR chemical shift ( $\delta$ , ppm) of all the binary systems of ACM and cofomers.

|          | <b>Carbonyl</b> | <b>Ester</b> | <b>Amide</b>    | <b>Aromatic</b>                                                                                     | <b>AliphaticCH</b><br>2                  | <b>OMe</b> | <b>Me</b> |
|----------|-----------------|--------------|-----------------|-----------------------------------------------------------------------------------------------------|------------------------------------------|------------|-----------|
| ACM      | 175.0           | 172.0        | 167.4           | 156.9,135.6,133.5,<br>131.0,128.3,126.4,<br>114.5,107.8,105.1                                       | 60.1,<br>28.0                            | 54.2       | 14.2      |
| ACM-INA  | 173.6           | 172.6        | 162.4,<br>178.9 | 148.4,140.7,139.5,<br>137.4,136.0,134.2,<br>131.2,127.4,119.9,<br>111.9,109.8                       | 67.0,<br>33.6                            | 59.6       | 18.7      |
| ACM-NAM  | 171.5           | 170.6        | 168.0           | 154.2, 147.2, 139.7,<br>136.6, 132.9, 129.7,<br>127.9,124.5, 112.1,<br>98.5                         | 62.6,<br>28.9                            | 53.7       | 13.29     |
| ACM-PAM  | 172.5,          | 171.2        | 168.3           | 157.0,148.8,140.1,<br>135.6,134.7,133.1,<br>131.7,128.8,126.5,<br>125.6,123.2,114.3,<br>106.5,104.2 | 60.8,<br>27.9                            | 54.1       | 13.1      |
| ACM-CPR  | 171.7           | 168.6        | 167.2,<br>181.7 | 135.6, 131.8,130.6,<br>127.7, 113.7, 107.4,<br>103.8                                                | 60.1, 27.7,<br>41.5, 34.9,<br>31.1, 23.8 | 53.5       | 14.0      |
| ACM-PABA | 172.5           | 170.0        | 167.8           | 154.9, 150.8,133.3,<br>132.7,131.7,129.9,<br>125.0,116.7,115.9,<br>113.4,112.4,104.6                | 59.9,<br>26.6                            | 54.2       | 12.9      |
| ACM-PPZ  | 174.7           | 170.7        | 165.5           | 154.9, 134.7, 130.9,<br>129.2,117.5,113.8,<br>111.3,98.6                                            | 63.7,29.4,<br>41.3,39.0                  | 51.8       | 16.8      |
| INA      |                 |              | 172.0           | 150.6,149.3,139.8,<br>120.4                                                                         |                                          |            |           |
| PAM      |                 |              | 168.0           | 149.3,146.5,139.3,<br>135.5,127.0,123.7,<br>121.5                                                   |                                          |            |           |
| NAM      |                 |              | 168.9           | 152.4,148.3,136.9,<br>129.4,122.3                                                                   |                                          |            |           |
| PPZ      |                 |              |                 |                                                                                                     | 45.3                                     |            |           |
| PABA     | 179.0           |              |                 | 158.1,135.8,121.5,<br>116.8                                                                         |                                          |            |           |
| CPR      |                 |              | 180.4           |                                                                                                     | 24.9,29.7,<br>36.1,41.0                  |            |           |

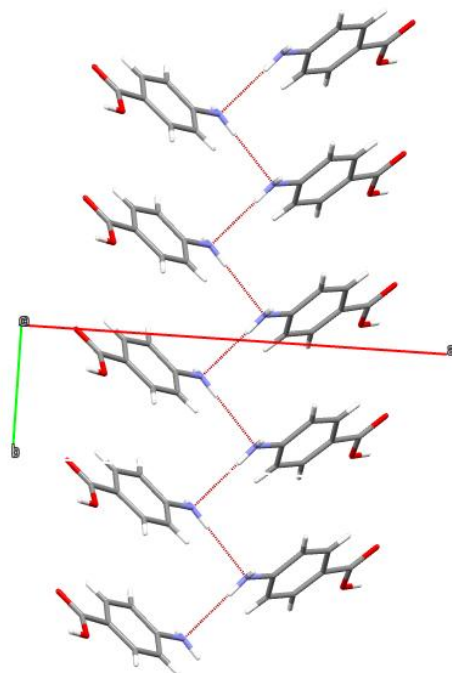

**Figure S1**  $2_1$  screw axis related PABA molecules form 1D chain via cooperative N–H...N hydrogen bonds along the *b*-axis.

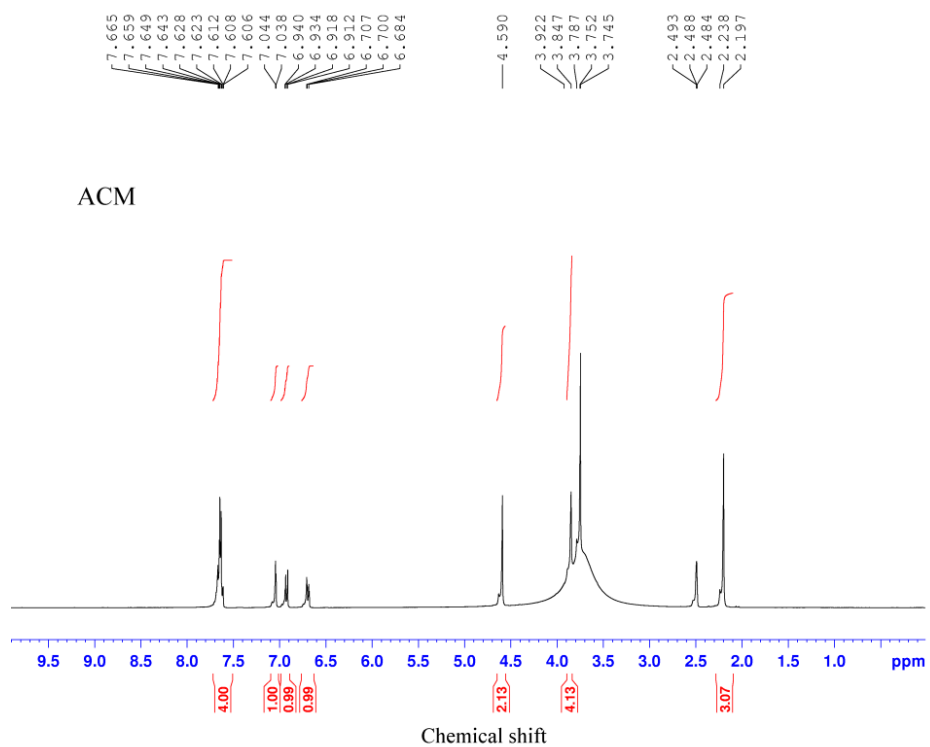

(a)

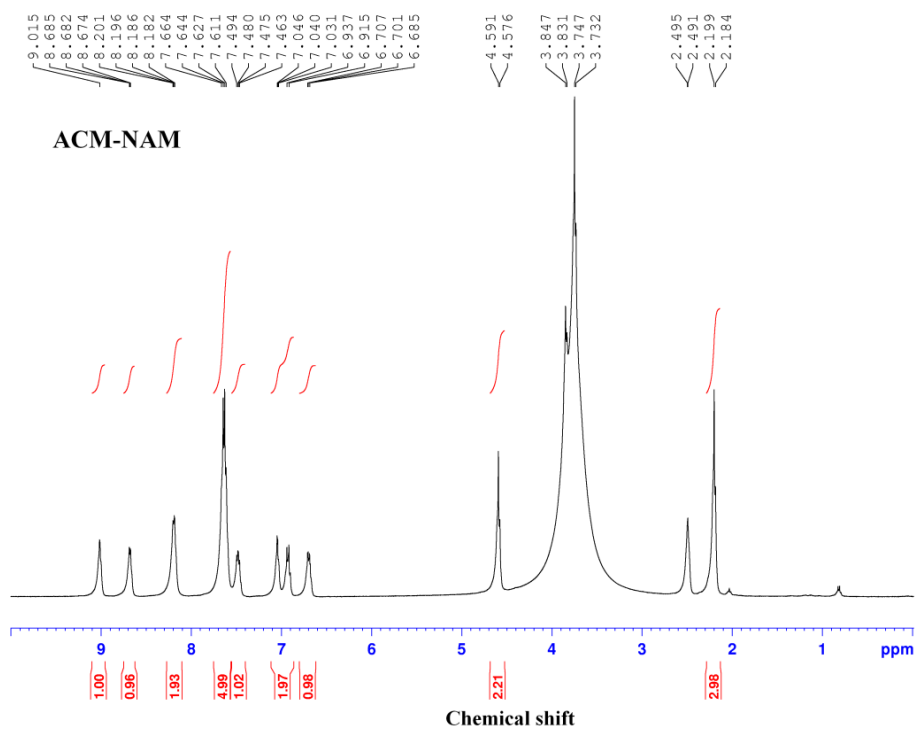

(b)

**Figure S2**  $^1\text{H}$  solution NMR of (a) ACM, (b) ACM-NAM in  $\text{DMSO-}d_6$  solution suggests 1:1 stoichiometry between the ACM and NAM.

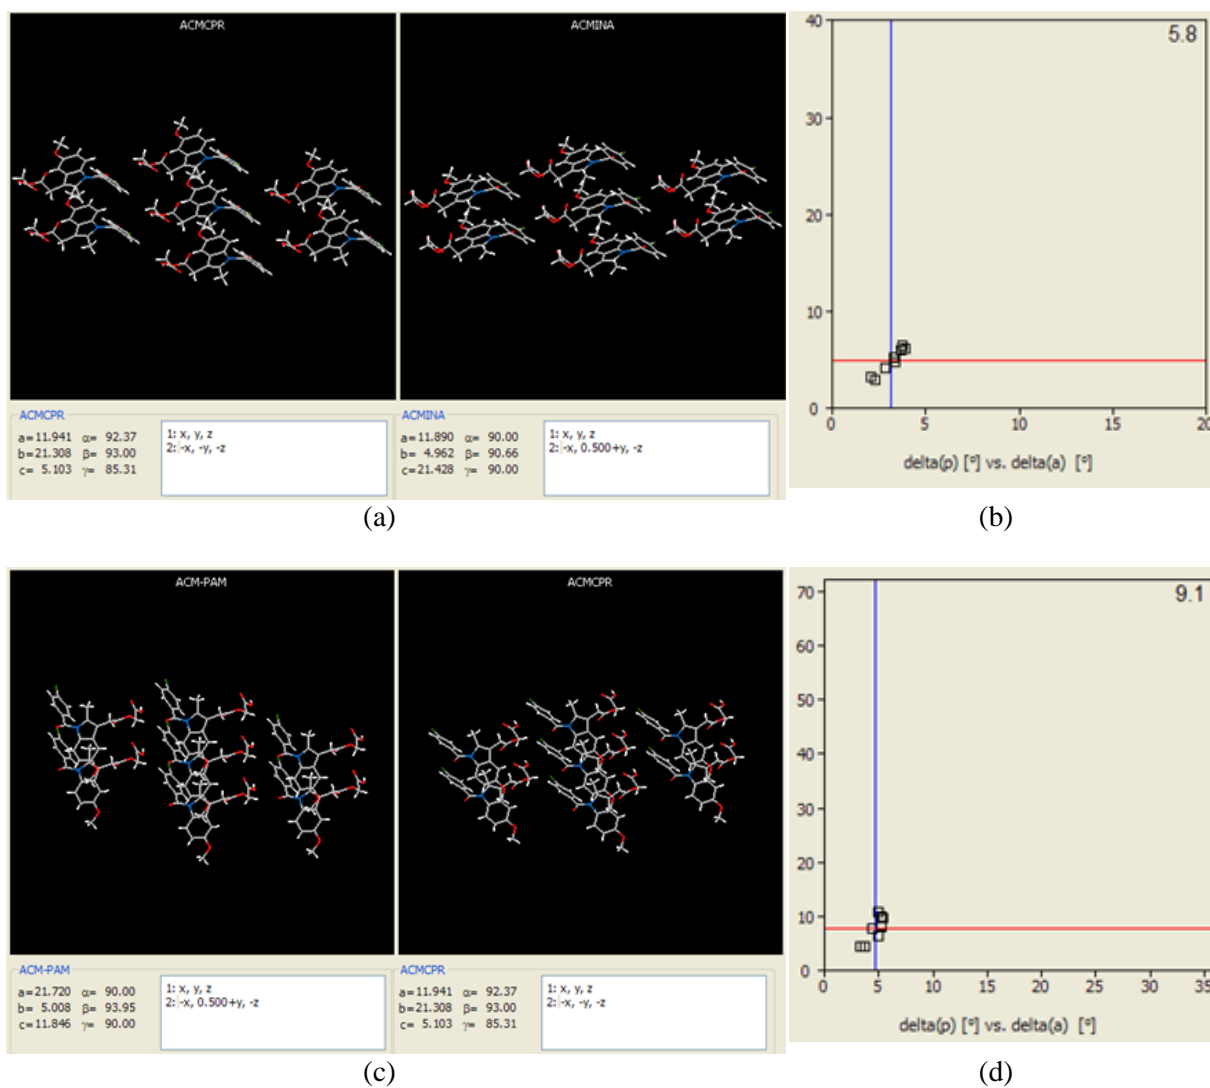

**Figure S3** 2D supramolecular construct of (a) ACM–CPR and ACM–INA and (c) ACM–PAM and ACM–CPR cococrystals was confirmed by XPac analysis. (b), (d) Inter-planar angular deviation ( $\delta p$ , x-axis) vs. angular deviation ( $\delta a$ , y-axis) plot (in  $^\circ$ ) indicates dissimilarity index of 5.9 and 9.1 which means cococrystals have the same 2D supramolecular construct.

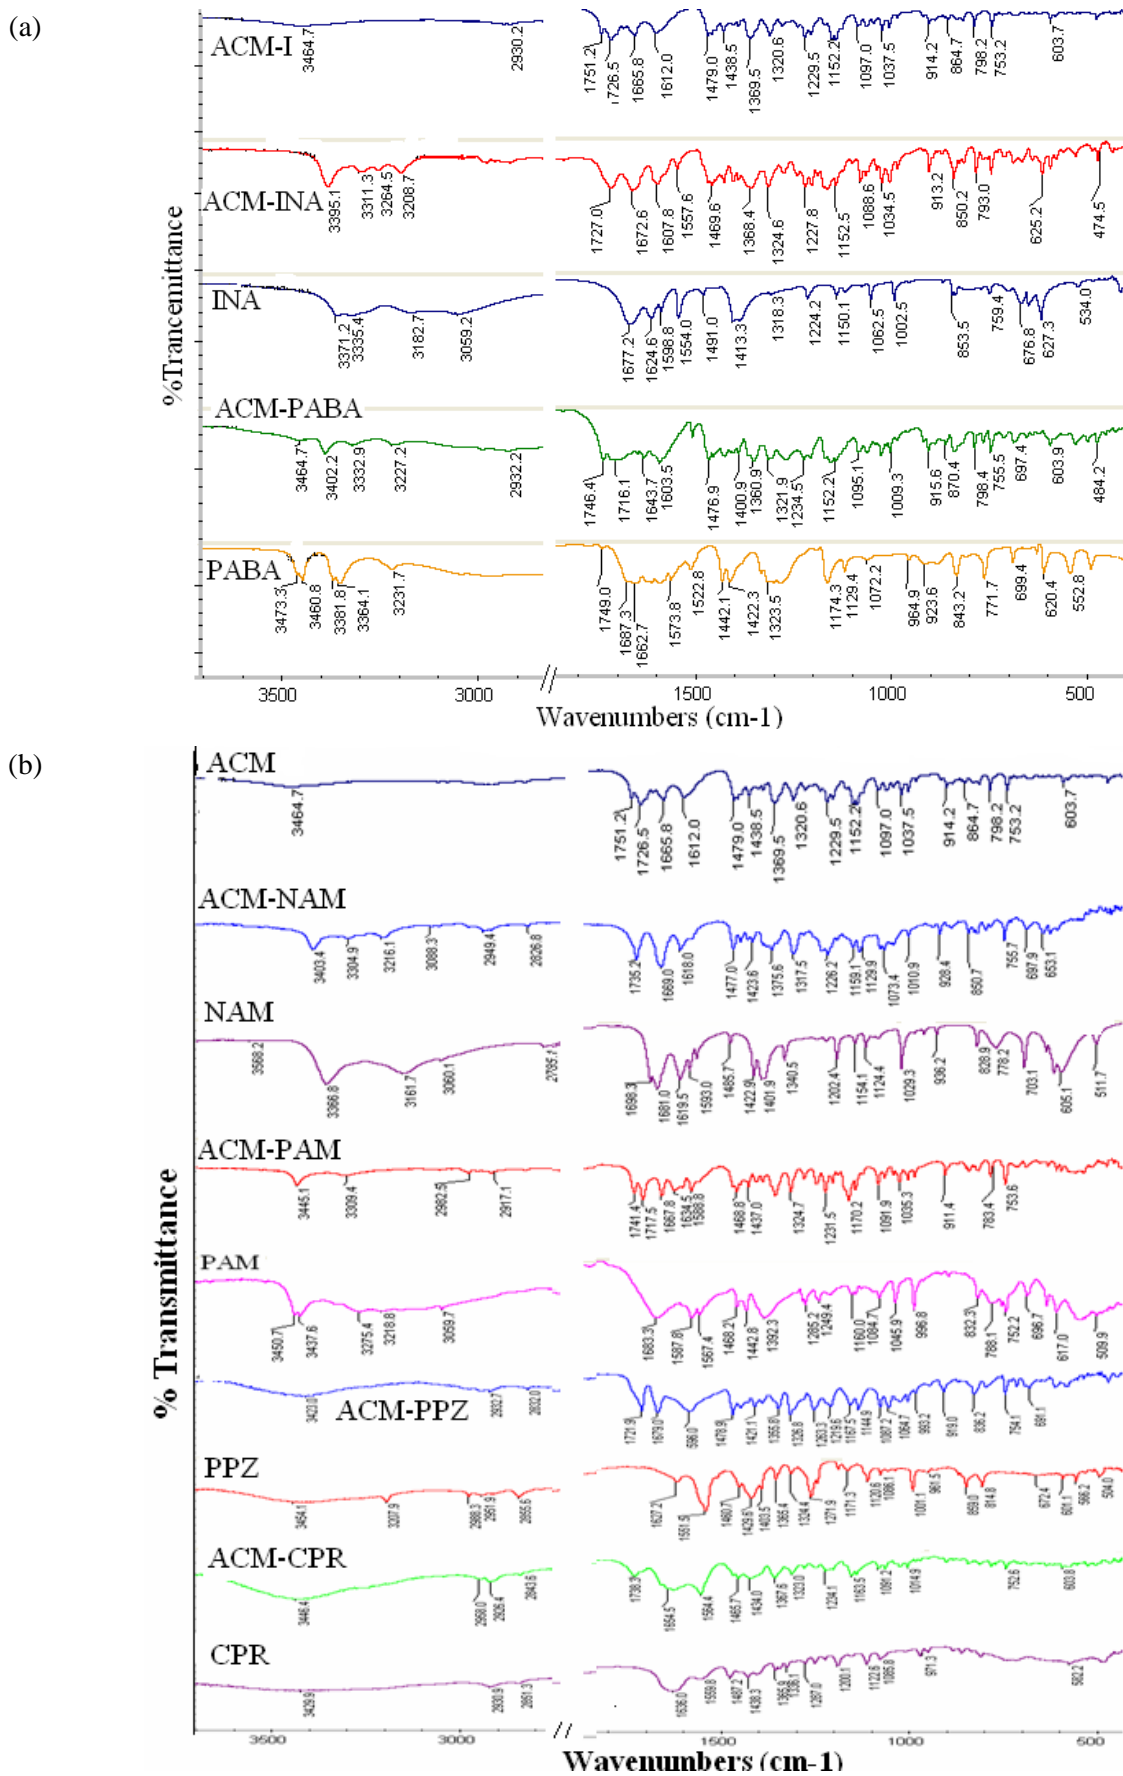

Figure S4 FT-IR spectra of ACM binary compounds indicate either cocrystal or salt formation.

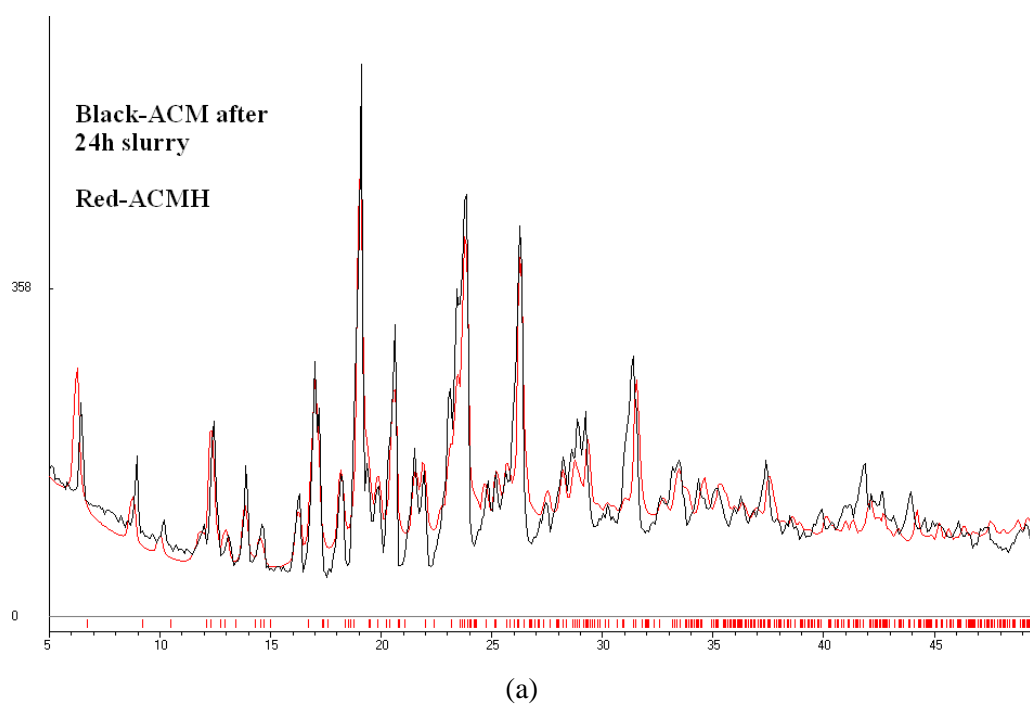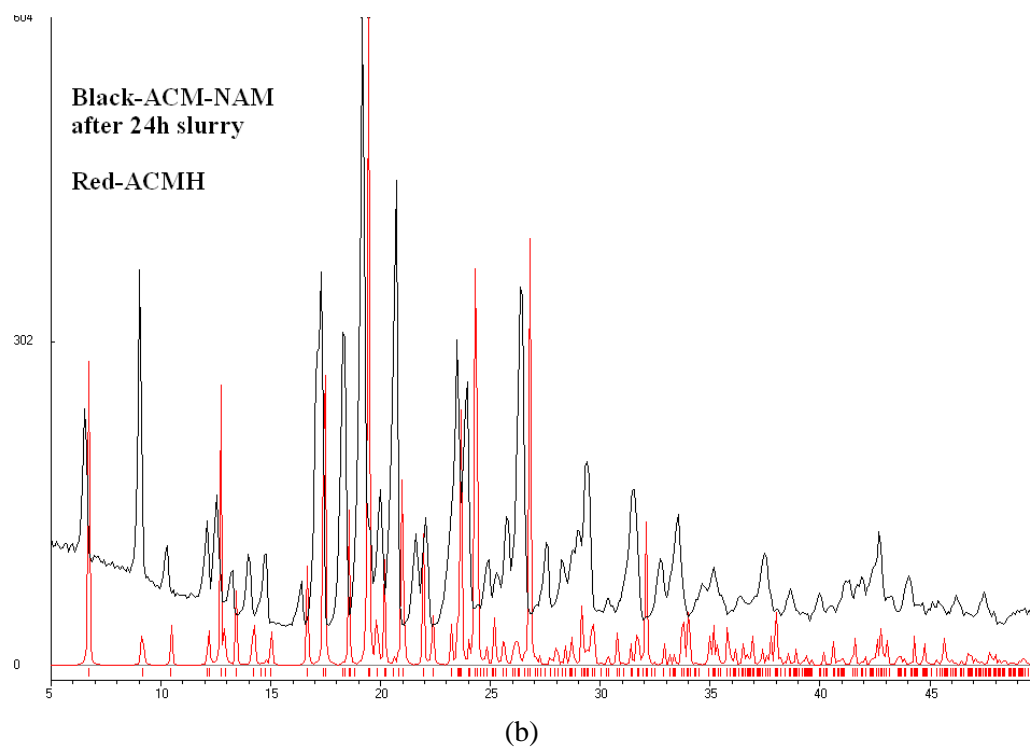



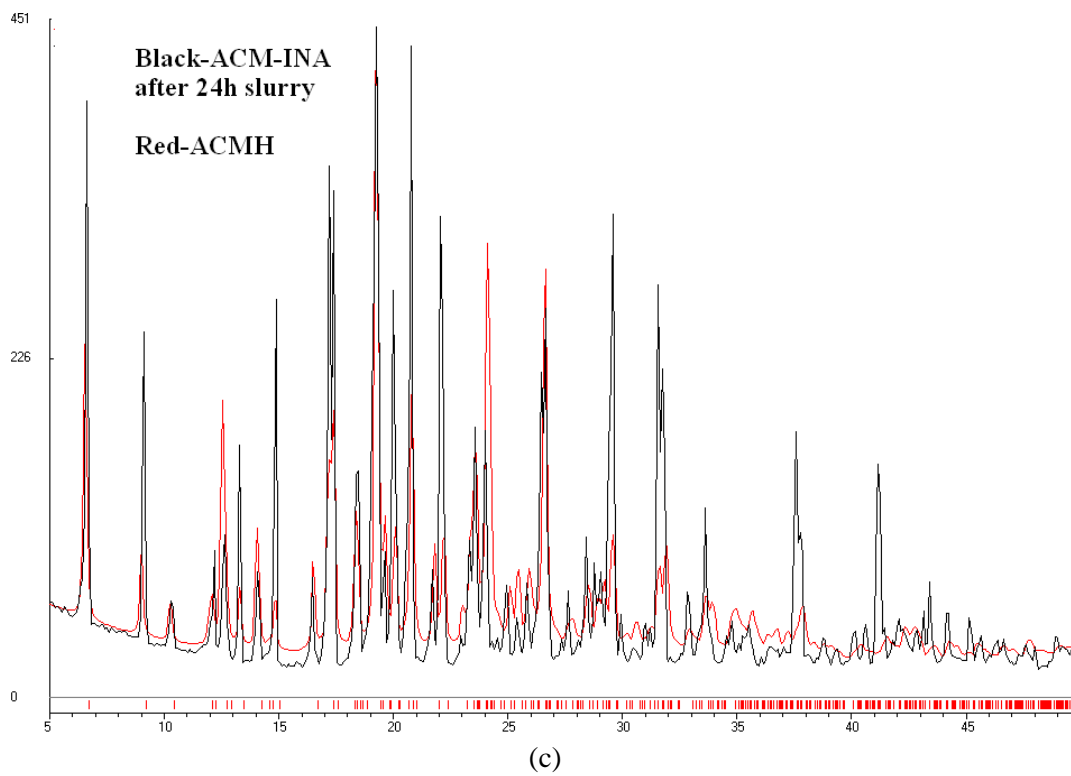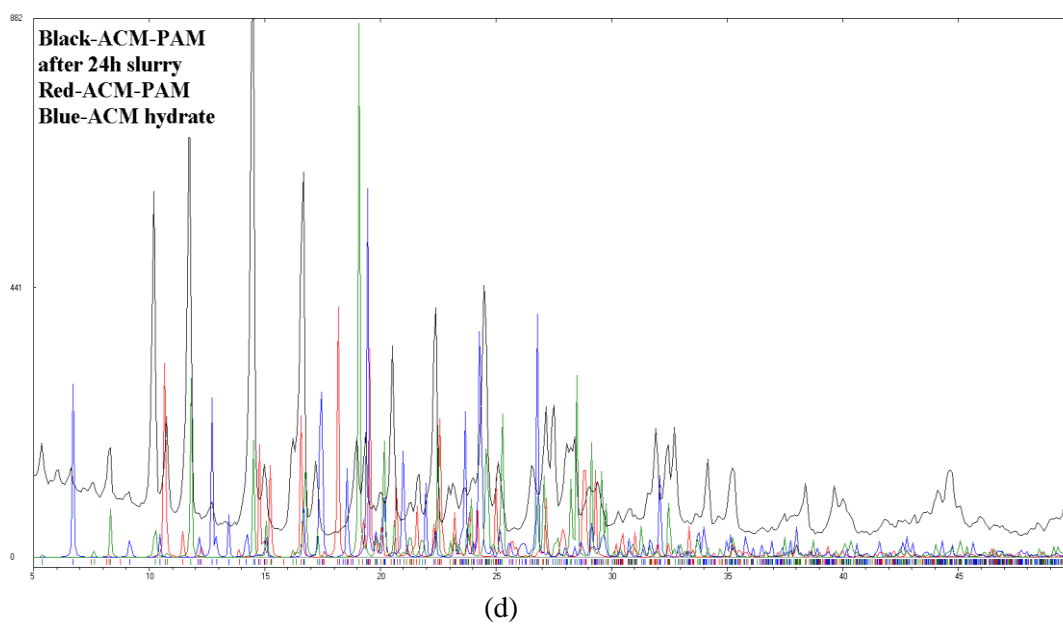

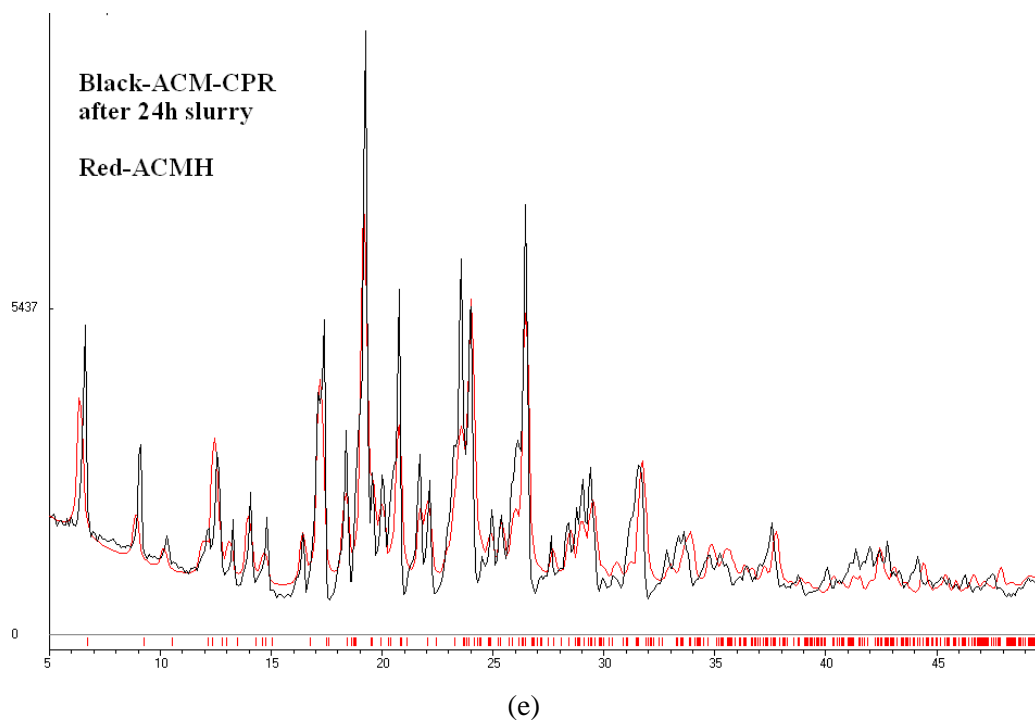

**Figure S5** PXRD (black trace) of ACM (a) and its binary systems (b-e) after 24 h slurry experiments with the calculated X-ray diffraction lines (red trace) of acemetacin hydrate. ACM-PAM cocrystal showed that partial quantity of cocrystal still remained after 24 h slurry whereas the other cocrystals transformed completely to the hydrate in that period.
